# Supplementary material for: Diagnostic value of combining preoperative inflammatory markers ratios with CA199 for patients with early-stage pancreatic cancer
Source: Springer Nature journal article supplement (doi:10.1186/s12885-023-10653-4), 2023-03-10
Supplement: MOESM1 [file 24610094]

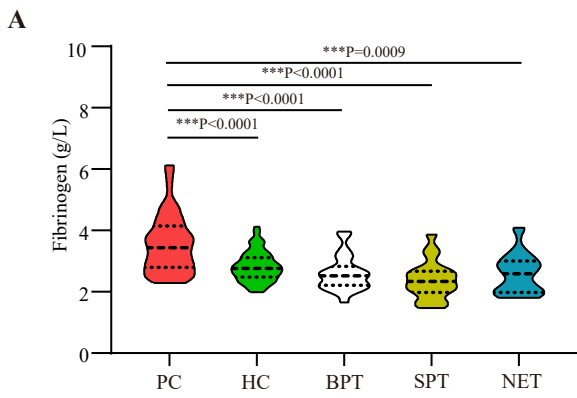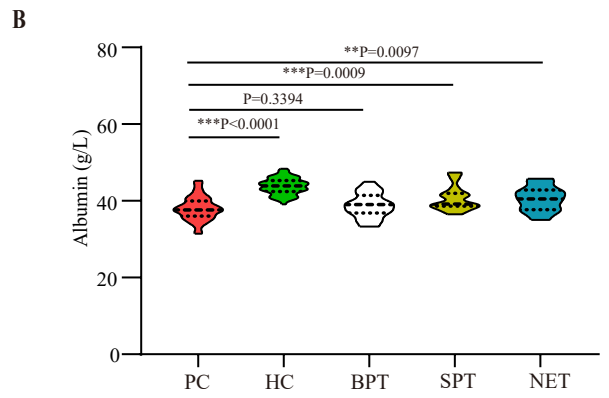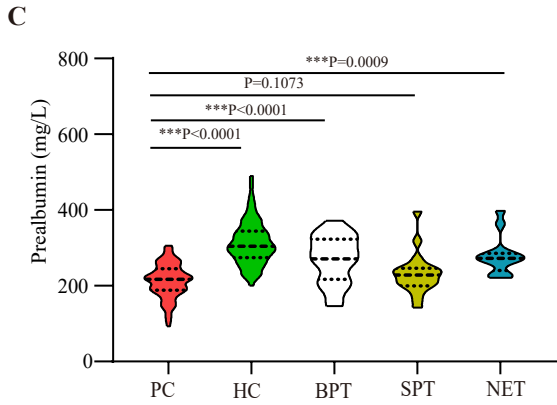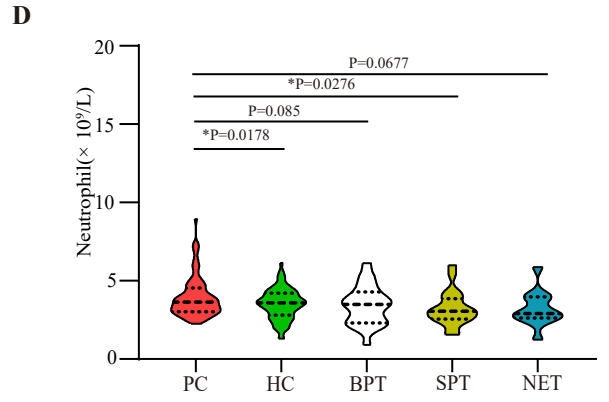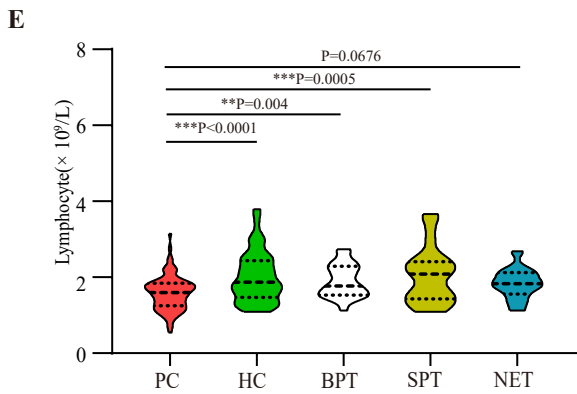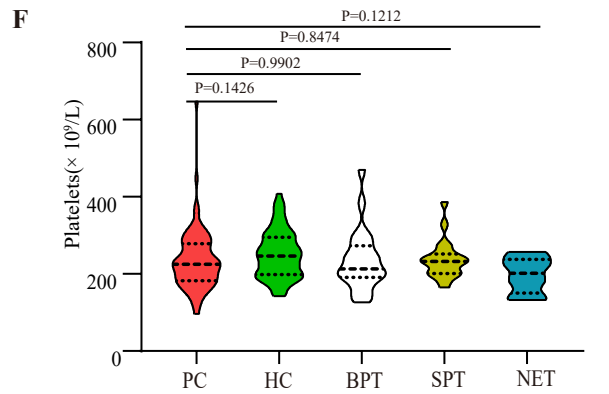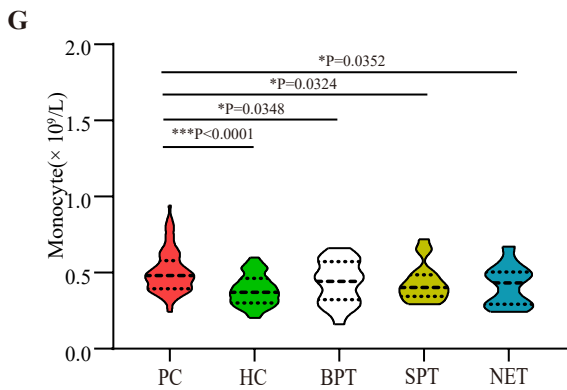

**Supplementary Figure 1** The circulating inflammation markers in PC, HC, BPT, SPT, and PNET in testing set 1. The plasma fibrinogens(**A**), serum albumins (**B**), prealbumin (**C**), neutrophils (**D**), lymphocytes (**E**), platelets (**F**), and monocytes (**G**) in PC, HC, BPT, SPT, and PNET. Abbreviations: PC, pancreatic cancer; BPT, benign pancreas tumors; SPT, solid pseudo papilloma of the pancreas; PNET, patients with pancreatic neuroendocrine tumors; HC, healthy controls.
