# Supplementary material for: Diagnostic value of combining preoperative inflammatory markers ratios with CA199 for patients with early-stage pancreatic cancer
Source: Springer Nature journal article supplement (doi:10.1186/s12885-023-10653-4), 2023-03-10
Supplement: MOESM2 [file 24610094]

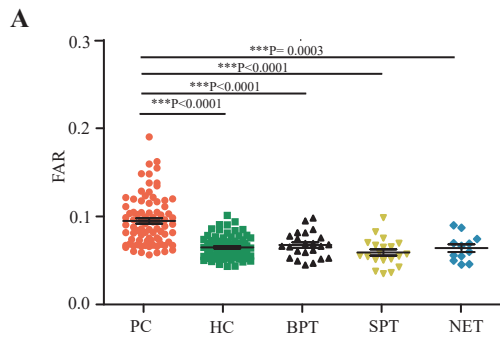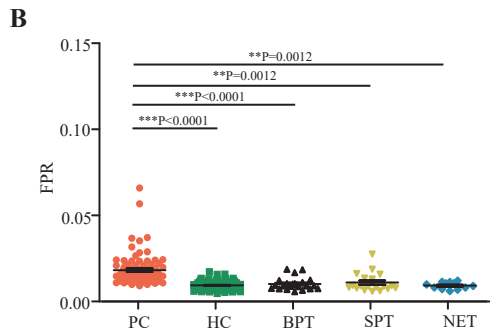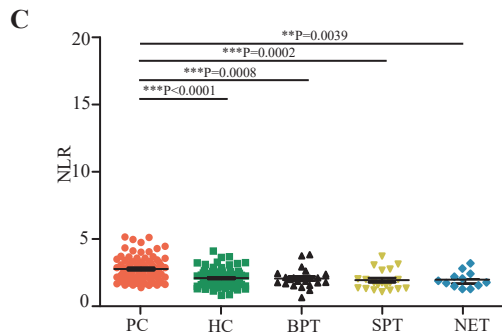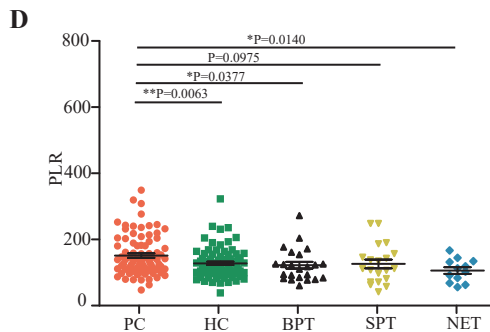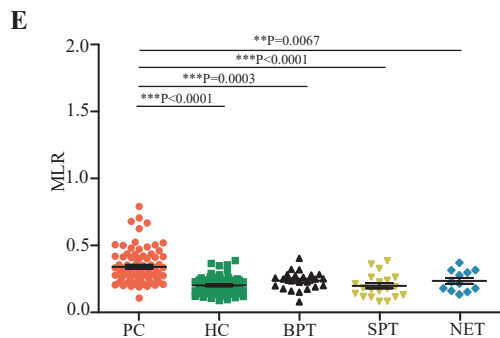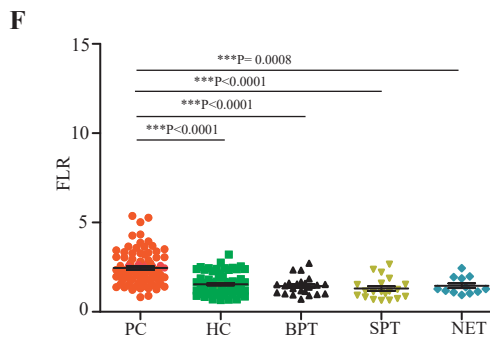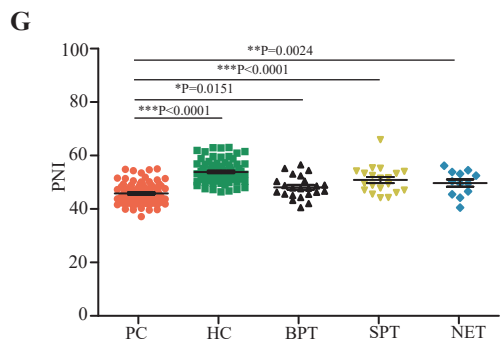

**Supplementary Figure 2** The inflammation markers ratios in PC, HC, BPT, SPT, and PNET in testing set 1. The FAR (A), FPR (B), NLR (C), PLR (D), MLR (E), FLR (F), and PNI (G) in PC, HC, BPT, SPT, and PNET. Abbreviations: PC, pancreatic cancer; BPT, benign pancreas tumors; SPT, solid pseudo papilloma of the pancreas; PNET, patients with pancreatic neuroendocrine tumors; HC, healthy controls; FAR, fibrinogen-to-albumin ratio; FPR, fibrinogen-to-prealbumin ratio; NLR, neutrophil-to-lymphocyte ratio; PLR, platelets-to-lymphocyte ratio; MLR monocytes-to-lymphocyte ratio; PNI, albumin +5×the lymphocyte count, FLR, fibrinogen-to- lymphocyte ratio.
