# Supplementary material for: Diagnostic value of combining preoperative inflammatory markers ratios with CA199 for patients with early-stage pancreatic cancer
Source: Springer Nature journal article supplement (doi:10.1186/s12885-023-10653-4), 2023-03-10
Supplement: MOESM3 [file 24610094]

**A**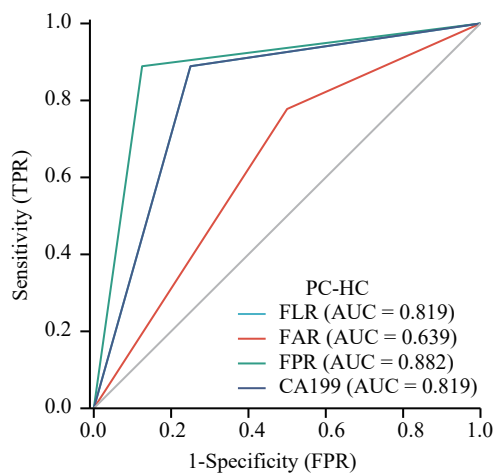**B**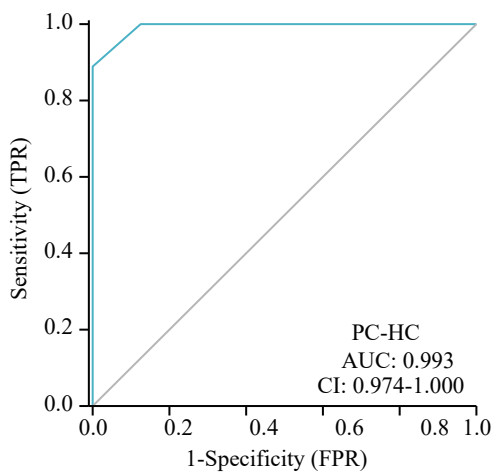**C**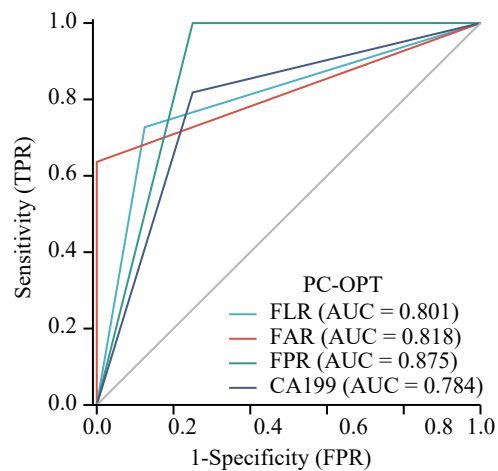**D**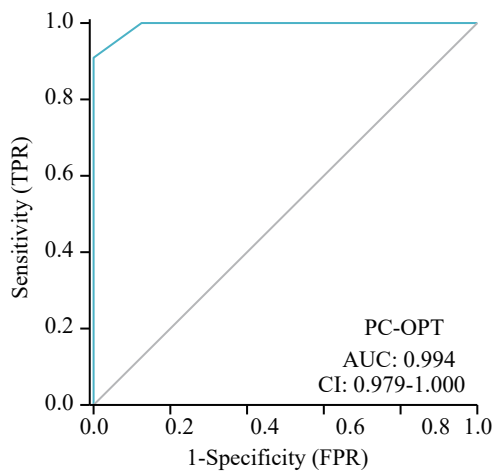

**Supplementary Figure 3** Diagnostic value of single and combined inflammation markers ratios in early-stage PC. **A** The ROC curve analysis of FAR, FPR, FLR, and CA199 between PC and HC in testing set 2. **B** The ROC curve analysis of combined FAR, FPR, FLR, and CA199 in PC and HC in testing set 2. **C** The ROC curve analysis of combined FAR, FPR, FLR, and CA199 between PC and OPT in testing set 2. **D** The ROC curve analysis of combined FAR, FPR, FLR, and CA199 between PC and OPT in testing set 2. Abbreviations: PC, pancreatic cancer; OPT, other pancreas tumors; HC, healthy controls; FAR, fibrinogen-to-albumin ratio; FPR, fibrinogen-to-prealbumin ratio; FLR, fibrinogen-to-lymphocyte ratio; ROC, receiver operating characteristic.
