# Supplementary material for: Diagnostic value of combining preoperative inflammatory markers ratios with CA199 for patients with early-stage pancreatic cancer
Source: Springer Nature journal article supplement (doi:10.1186/s12885-023-10653-4), 2023-03-10
Supplement: MOESM4 [file 24610094]

**A**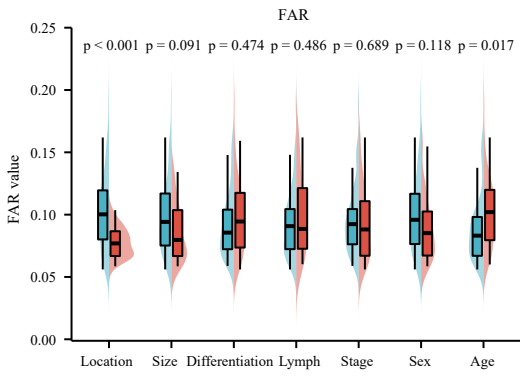**B**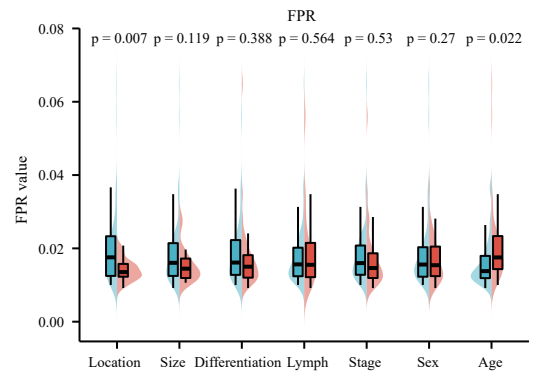**C**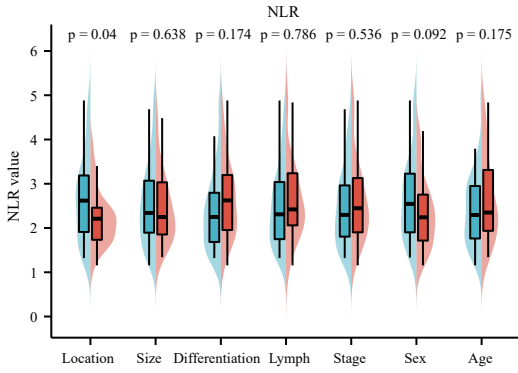**D**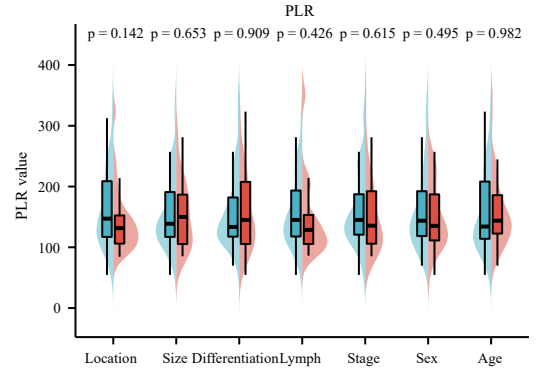**E**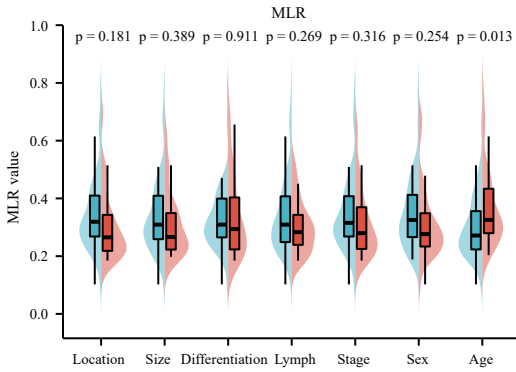**F**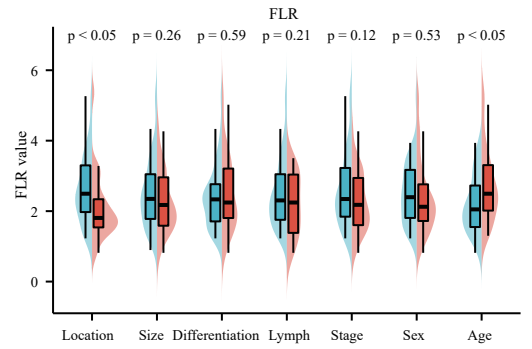**G**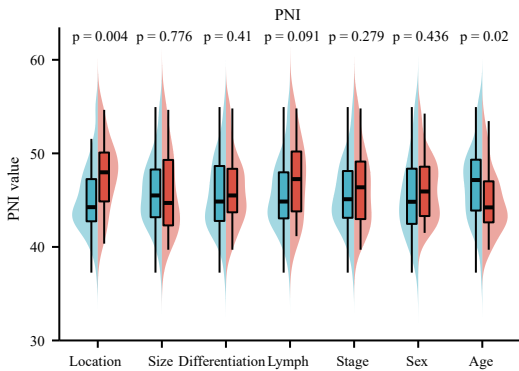

**Supplementary Figure 4** Comparison of inflammation markers ratios in different clinical characteristics early-stage PC. The FAR (A), FPR (B), NLR (C), PLR (D), MLR (E), FLR (F), and PNI (G) for different tumor locations, tumor sizes, differentiation, lymph nodes, stage, sex, and age in testing set 1. Abbreviations: PC, pancreatic cancer; FAR, fibrinogen-to-albumin ratio; FPR, fibrinogen-to-prealbumin ratio; NLR, neutrophil-to-lymphocyte ratio; PLR, platelets-to-lymphocyte ratio; MLR monocytes-to-lymphocyte ratio; PNI, albumin+5×the lymphocyte count; FLR, fibrinogen-to- lymphocyte ratio; Blue column: location, pancreatic head/tumor size≤4cm/ differentiation well / lymph node metastasis no /stage I/sex male/age ≤60; Red column: location, pancreatic body and tail/tumor size> 4cm/ differentiation poor / lymph node metastasis yes /stage II/sex male/age >60.
